# Supplementary material for: Expression profile analysis identifies key genes as prognostic markers for metastasis of osteosarcoma
Source: PubMed Central journal article supplement (PMC7106759; doi:10.1186/s12935-020-01179-x), 2020-03-30

### Sample clustering to detect outliers

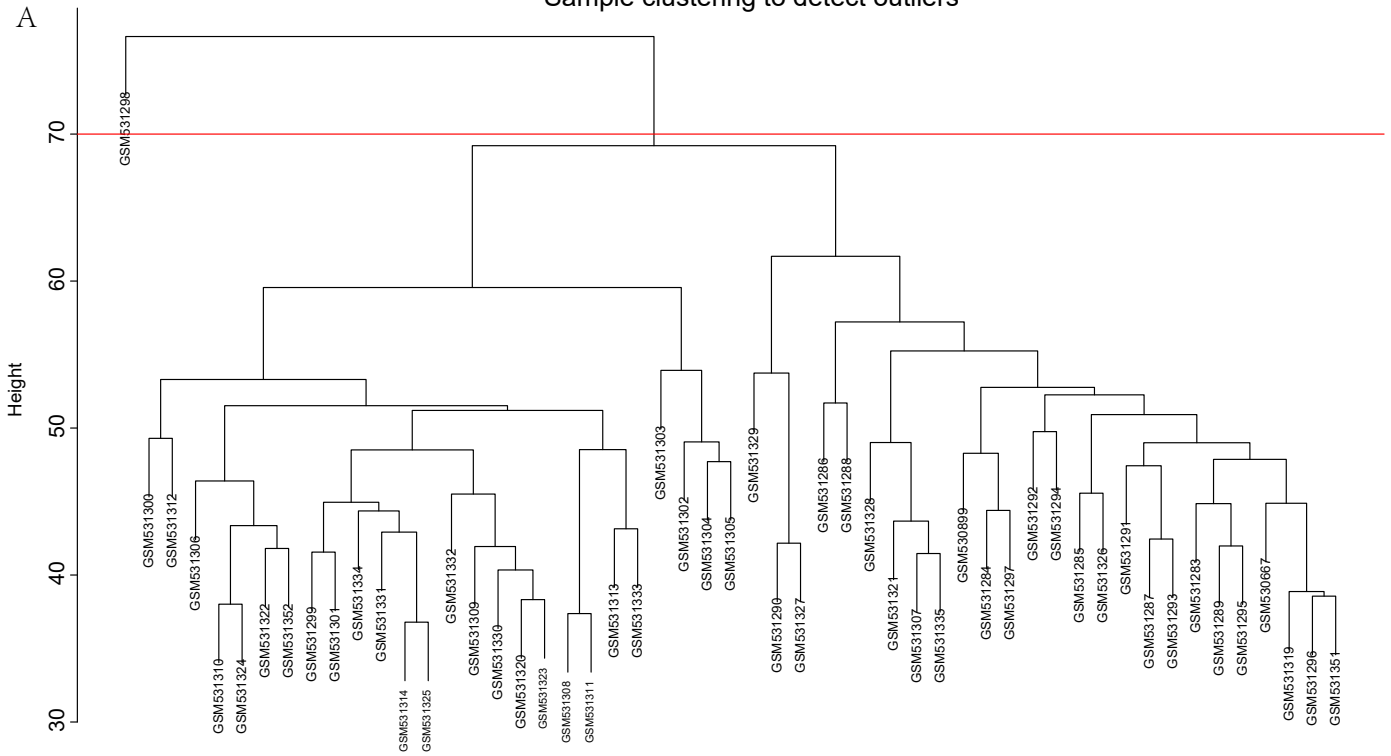

### B Scale independence

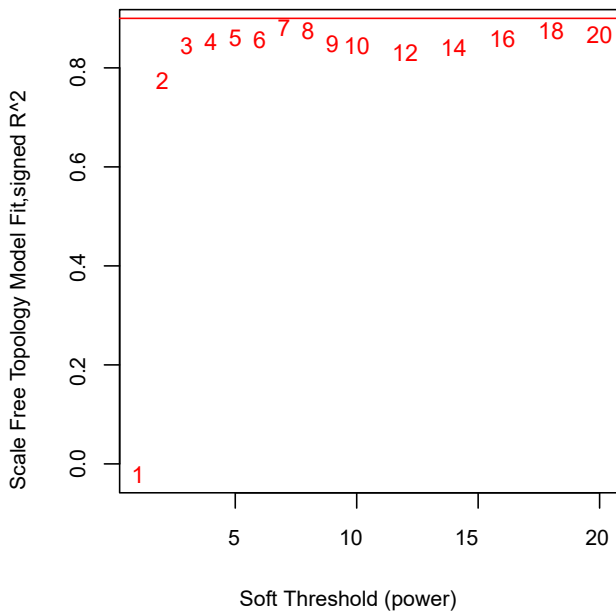

### C Mean connectivity

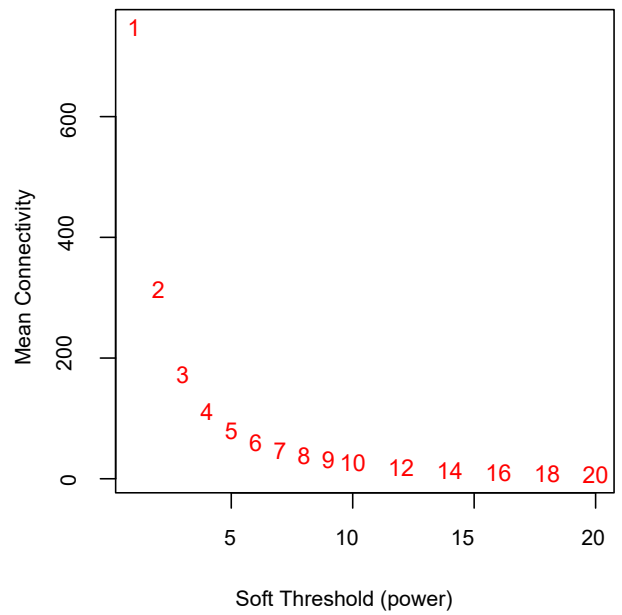

D

Network heatmap plot

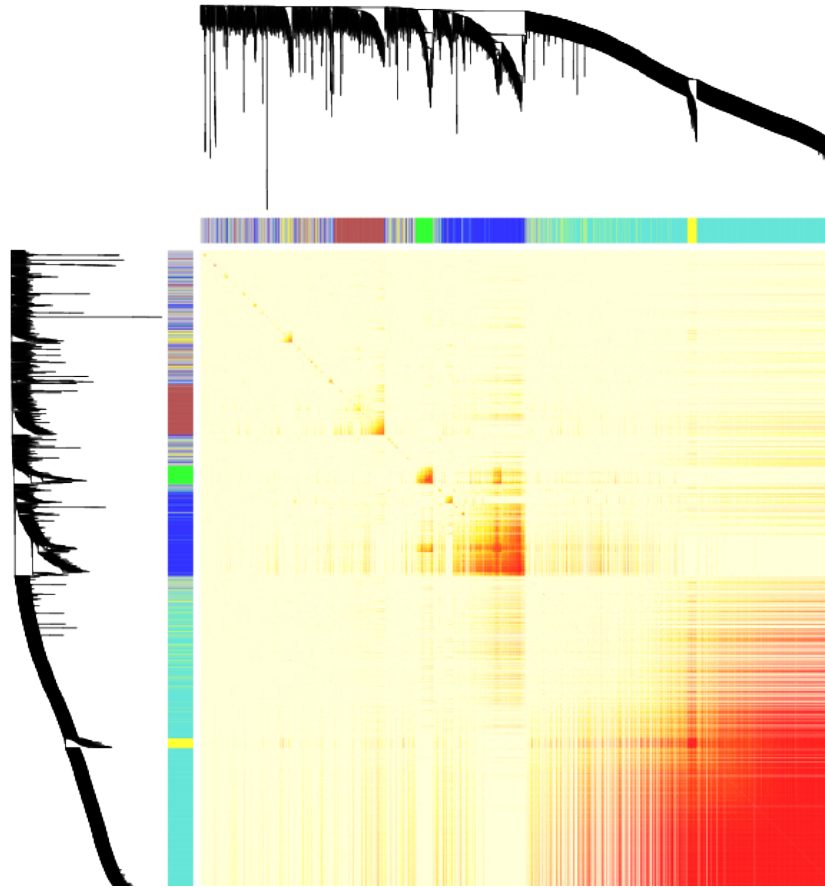

E

Eigengene dendrogram

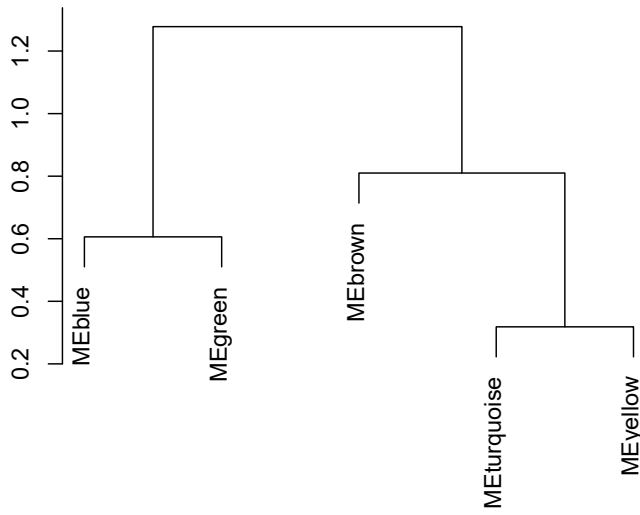

F

Eigengene adjacency heatmap

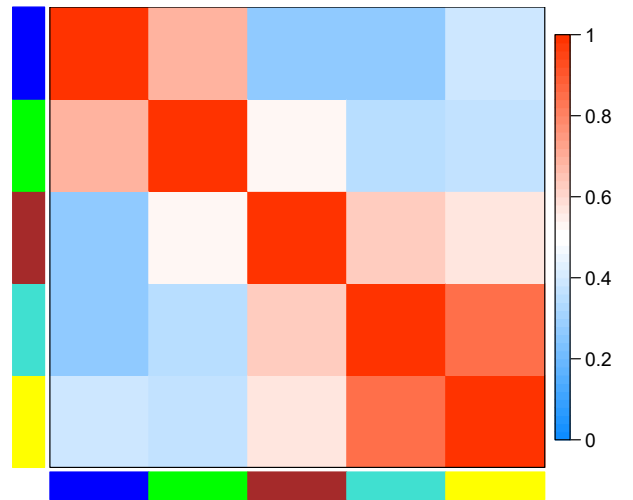

Supplement: 12935_2020_1179_MOESM1_ESM.pdf [file 12935_2020_1179_MOESM1_ESM.pdf]
